# Supplementary material for: Unbiased chromatin accessibility profiling by RED-seq uncovers unique features of nucleosome variants in vivo
Source: PubMed Central journal article supplement (PMC4378318; doi:10.1186/1471-2164-15-1104), 2014-12-15
Supplement: 12864_2014_6869_MOESM3_ESM.pdf [file 12864_2014_6869_MOESM3_ESM.pdf]

**Additional File 3. Sequences of barcoded and biotinylated adaptors.**

| <b>Name</b>           | <b>Forward sequence</b>                 | <b>Reverse sequence</b>                      |
|-----------------------|-----------------------------------------|----------------------------------------------|
| Modified-Biotin-Set2  | p-GCAGATCGGAAGAGCGTCGTGTAGGGAAAGAGTGT   | Biotin-ACACTCTTTCCCTACACGACGCTCTTCCGATCTGCT  |
| Modified-Set2         | p-GCAGATCGGAAGAGCTCGTATGCCGTCTTCTGCTTG  | CAAGCAGAAGACGGCATACGAGCTCTTCCGATCTGCT        |
| Modified-Biotin-Set5  | p-CGTAGATCGGAAGAGCGTCGTGTAGGGAAAGAGTGT  | Biotin-ACACTCTTTCCCTACACGACGCTCTTCCGATCTACGT |
| Modified-Set5         | p-CGTAGATCGGAAGAGCTCGTATGCCGTCTTCTGCTTG | CAAGCAGAAGACGGCATACGAGCTCTTCCGATCTACGT       |
| Modified-Biotin-Set6  | p-ATGAGATCGGAAGAGCGTCGTGTAGGGAAAGAGTGT  | Biotin-ACACTCTTTCCCTACACGACGCTCTTCCGATCTCATT |
| Modified-Set6         | p-ATGAGATCGGAAGAGCTCGTATGCCGTCTTCTGCTTG | CAAGCAGAAGACGGCATACGAGCTCTTCCGATCTCATT       |
| Modified-Biotin-Set8  | p-GCTAGATCGGAAGAGCGTCGTGTAGGGAAAGAGTGT  | Biotin-ACACTCTTTCCCTACACGACGCTCTTCCGATCTAGCT |
| Modified-Set8         | p-GCTAGATCGGAAGAGCGGTTTCAGCAGGAATGCCGAG | CTCGGCATTCTGCTGAACCGCTCTTCCGATCTAGCT         |
| Modified-Biotin-Set10 | p-CGAAGATCGGAAGAGCGTCGTGTAGGGAAAGAGTGT  | Biotin-ACACTCTTTCCCTACACGACGCTCTTCCGATCTTCGT |
| Modified-Set10        | p-CGAAGATCGGAAGAGCGGTTTCAGCAGGAATGCCGAG | CTCGGCATTCTGCTGAACCGCTCTTCCGATCTTCG          |
