# Supplementary material for: Unbiased chromatin accessibility profiling by RED-seq uncovers unique features of nucleosome variants in vivo
Source: PubMed Central journal article supplement (PMC4378318; doi:10.1186/1471-2164-15-1104), 2014-12-15
Supplement: 12864_2014_6869_MOESM4_ESM.pdf [file 12864_2014_6869_MOESM4_ESM.pdf]

**Additional File 4. qPCR primers for DHSs.**

| <b>Name</b> | <b>Forward sequence</b> | <b>Reverse sequence</b> |
|-------------|-------------------------|-------------------------|
| DHS-Chr1    | CAGGTGGAGGGAGACAGAGA    | TGGCAAGAAGGACTGTTGGT    |
| DHS-Chr6    | TGCTCTCTTCCACCCTCTGT    | GGAGAGCCCTAGACTGGAAC    |
| DHS-Chr10   | CAGTGCCCAGACTCATCCTG    | TGATGTCACATGCCTAGCCA    |
| DHS-Chr11   | TACCTGGAACCGGTTTACCC    | CCTGAGCATCGACTCTCCAA    |
| DHS-Chr12   | GGTTGGAGTTGGAATCCGCA    | AGCAAAGAAGGCACAGCTATG   |
| DHS-Chr16   | GCATGCCTCGTACCTGTGTA    | GCAGGTAGGCGCTCTTACAG    |
