# Supplementary material for: Unbiased chromatin accessibility profiling by RED-seq uncovers unique features of nucleosome variants in vivo
Source: PubMed Central journal article supplement (PMC4378318; doi:10.1186/1471-2164-15-1104), 2014-12-15
Supplement: 12864_2014_6869_MOESM5_ESM.pdf [file 12864_2014_6869_MOESM5_ESM.pdf]

**Additional File 5. qPCR primers for CTCF binding sites.**

| <b>Name</b>   | <b>Forward sequence</b>  | <b>Reverse sequence</b>  |
|---------------|--------------------------|--------------------------|
| CTCF-Chr2     | GGTTACCAAACCAGGTAAGATTTG | CTGCTCAGAAGAAGAAACTGGA   |
| CTCF-Chr16    | CATGTATGCCTACTTGCCAGA    | TGCTCTTACAGAGGTCCTGA     |
| CTCF-Chr15    | CACCCACATGGCAGCTAATA     | CTGCTTGTGTGTGCACTTTATG   |
| CTCF-Chr4     | ACCACTGACTGCTGAAAGTT     | CTGTTAGAAGGACTGACTGGTG   |
| CTCF-Chr1-1   | ACTATGCATGCAGTACCTGTG    | TGGCTCACGACTGTCTCTAA     |
| CTCF-Chr1-2   | GTACATGTAGTGCTCACAGAGG   | CAATGGCTGCTCTTCCAGTA     |
| CTCF-Chr7     | TGCATCATGTGTGGACCTAAT    | CAATTCCCAGAGCCCATGTA     |
| CTCF-control1 | GGTCCTGAACCCTTGAGAGA     | GCCCTCTAGTGGCAAAGAAA     |
| CTCF-control2 | GGCGATGAACTTTACCCATC     | TGTTTGCTATAAAACAGGACCAGA |
